# Supplementary material
Source: PubMed Central journal article supplement (PMC3400014)
Supplement: emboj2012156s1.pdf [file emboj2012156s1.pdf]

**A**

|              | Neomycin IC <sub>50</sub> (μM),<br>p value | Neomycin<br>Hill coefficient |
|--------------|--------------------------------------------|------------------------------|
| KCNQ2(wt)    | 211 ± 26                                   | 1.8 ± 0.4                    |
| KCNQ2(S541A) | 229 ± 16, p > 0.05                         | 1.7 ± 0.2                    |
| KCNQ2(S541D) | 109 ± 4, p < 0.001                         | 1.7 ± 0.1                    |
| KCNQ2(R353G) | 109 ± 6, p < 0.001                         | 1.3 ± 0.1                    |
| KCNQ2(S534D) | 152 ± 20, p=0.075                          | 1.6 ± 0.3                    |

**B**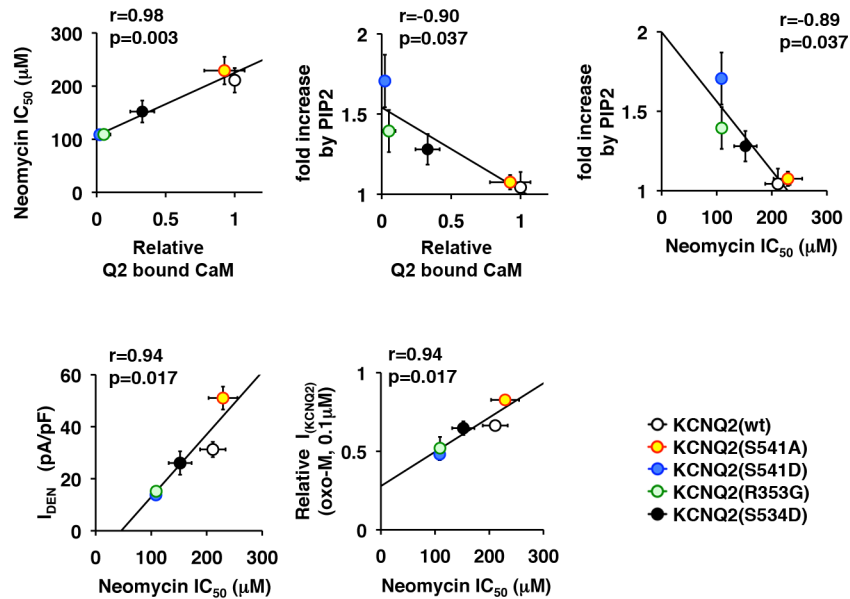

**Figure S1. Strong correlation among KCNQ2 bound calmodulin and PIP2 related parameters.**

**A)** Summary of fitted values shown in Fig. 4. Neomycin IC<sub>50</sub> and Hill coefficients are indicated. Two-tailed P values of t-test against KCNQ2(wt) using these fitted variables are indicated.

**B)** Scatter plots using quantified values shown in fig. 1d (KCNQ2 current at t = 1 min), fig. 1e (current density), fig. 2a (KCNQ2 bound calmodulin), fig. 4e and h (neomycin IC<sub>50</sub>), fig. 4f (diC8-PIP2 induced augmentation) and corresponding results using KCNQ2 (R353G) and KCNQ2 (S534D) are plotted with various combinations. Correlation coefficients (r) and p values are shown. These plots show significant correlations between calmodulin binding, neomycin IC<sub>50</sub> and PIP2 related parameters.

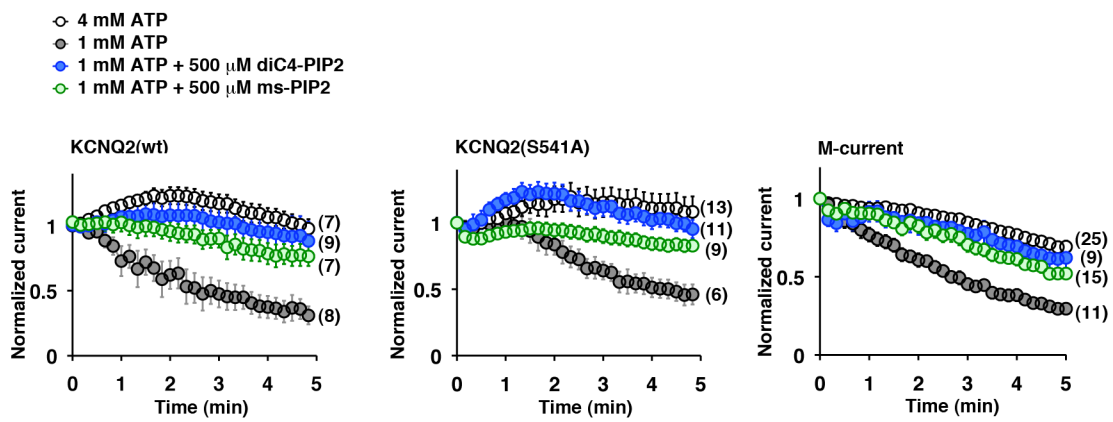

**Figure S2. Rundowns of KCNQ2 (wt), KCNQ2(S541A) currents and the M-currents from SCG neurons.**

The KCNQ2 channel showed severe rundown in the presence of 1 mM ATP, which was prevented either by 4 mM ATP, diC4-PIP2, or ms-PIP2. The M-current from SCG (right panel) showed similar rundown when recorded with whole-cell patch clamp technique. This run down is attenuated by, 4 mM ATP, diC4-PIP2, or ms-PIP2 .
