# Supplementary material
Source: PubMed Central journal article supplement (PMC3400014)

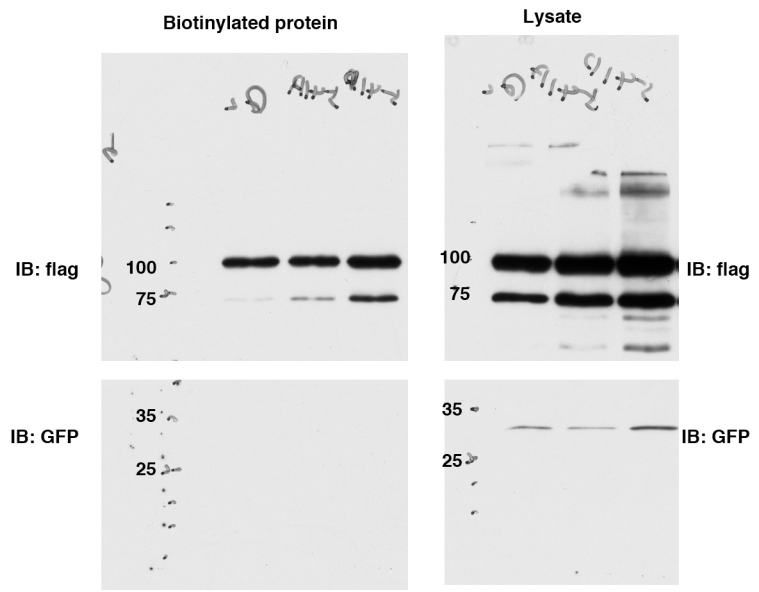

Supplement: emboj2012156s2.pdf [file emboj2012156s2.pdf]

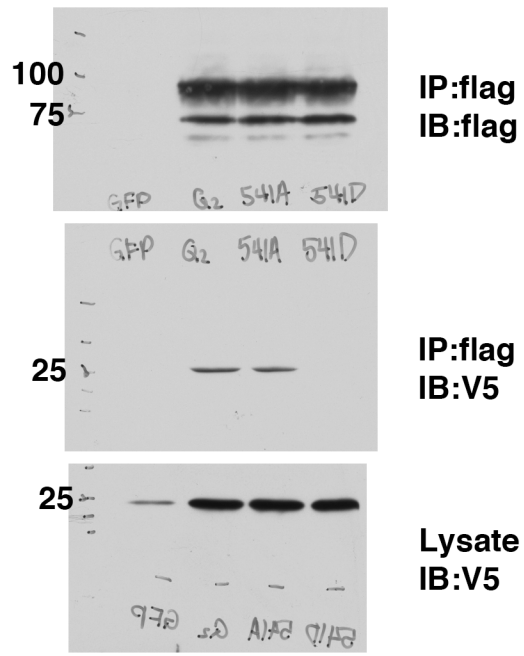

Supplement: emboj2012156s3.pdf [file emboj2012156s3.pdf]
